# Supplementary material for: Non-canonical Notch signaling represents an ancestral mechanism to regulate neural differentiation
Source: PubMed Central journal article supplement (PMC4335385; doi:10.1186/2041-9139-5-30), 2014-09-19
Supplement: 2041-9139-5-30-S1.pdf [file 2041-9139-5-30-S1.pdf]

# Control

# DAPT

## Deep

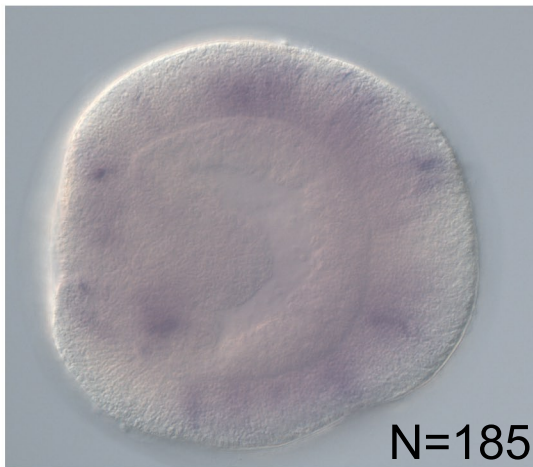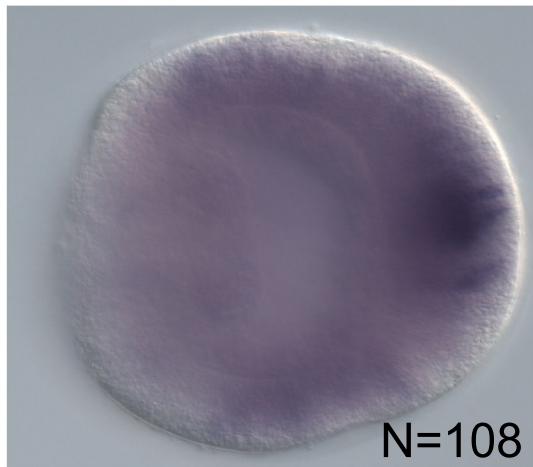

## Superficial

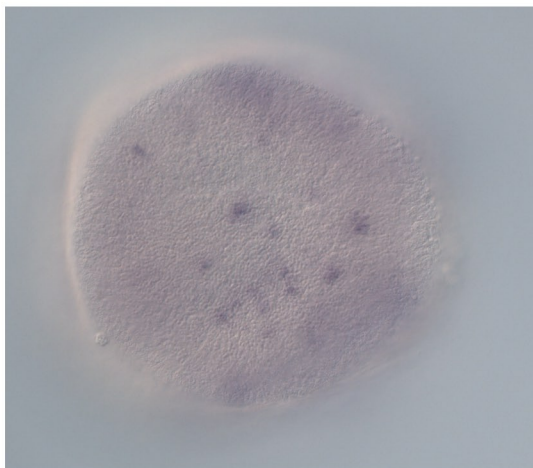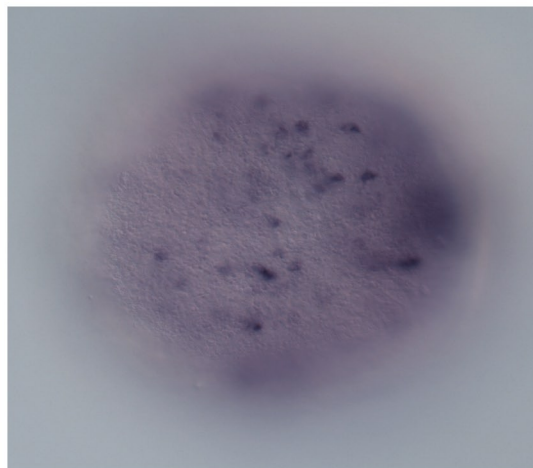

None Weak WT Strong
